# Supplementary material for: Molecular Genetics of FAM161A in North American Patients with Early-Onset Retinitis Pigmentosa
Source: PubMed Central journal article supplement (PMC3961368; doi:10.1371/journal.pone.0092479), 2014-03-20
Supplement: pone.0092479.s001.pdf [file pone.0092479.s001.pdf]

**Table S1. Primers for polymerase chain reaction amplification of *FAM161A* exons**

| Targeted Exon | Sense primer              | Antisense primer          | Annealing temperature (°C) | Amplification product (bp) |
|---------------|---------------------------|---------------------------|----------------------------|----------------------------|
| Exon 1        | AGTGGATTTTGCCTGACTTTTG    | AATAACGAAACACACCTGACAGAAC | 59                         | 728                        |
| Exon 2        | CTCCCTCTCGTTCTTAAATATCAC  | TGGGTGGGTCAGAAAGAAAAGAC   | 59                         | 668                        |
| Exon 3 (I)    | GTAAATGAAGGAGTCAAAGTGG    | CACCTAACCTTGTGTTTACTTTC   | 58                         | 1359                       |
| Exon 3 (II)   | GATTTAAAGCCAGACCCATTCT    | CCCAGCCAGGTAAACTAGAAATC   | 56                         | 768                        |
| Exon 3a       | ATTCTGATTGGCTTAAAGTGG     | TGGCTTTGAGGGAGATAGTTTC    | 62                         | 807                        |
| Exon 4        | GAGAATTAACCGGTATAGAAGAGGA | ATGATGAAGCCAACACAAACAACA  | 56                         | 437                        |
| Exon 5        | GGAGTGTAATTGTTGGTCATAGGGT | AAACGCTATAAAAGTGCCCATTG   | 53.5                       | 969                        |
| Exon 6        | ATACTTGCAGAGGGTTTGTTC     | AACCACCAAAGACCAATACTTCTC  | 59                         | 591                        |

Abbreviations: bp, base pairs
