# Supplementary material for: Molecular Genetics of FAM161A in North American Patients with Early-Onset Retinitis Pigmentosa
Source: PubMed Central journal article supplement (PMC3961368; doi:10.1371/journal.pone.0092479), 2014-03-20
Supplement: pone.0092479.s002.pdf [file pone.0092479.s002.pdf]

**Table S2. Primers for Sanger sequencing of *FAM161A* exons**

| Targeted Exon | Sequencing primer     |
|---------------|-----------------------|
| Exon 1        | GTAGGGACTATGTGCACAGG  |
| Exon 2        | AAGCAGCATTTTGGATCAGTG |
| Exon 3 (I)    | TACAAGGCAGAGGAGATGA   |
| Exon 3 (II)   | CAACATAAACTCCACAGAGC  |
| Exon 3a       | ATTCTGATTGGCTTAAAGTGG |
| Exon 4        | CTTTGTACAAGTTGATAAGT  |
| Exon 5        | CTCGTCTAAAAGGTTTGTC   |
| Exon 6        | TAAACACAAATGCGGCTGCT  |
